# Supplementary material
Source: publisher figshare collection journal article supplement (https://acs.figshare.com/ndownloader/files/11449682)
Supplement: Supplementary file 1 [file 11449682]

## Supporting Information

### **Anti-EGFR Peptide Conjugated Triangular Gold Nanoplates for Computed Tomography/Photoacoustic Imaging Guided Photothermal Therapy of Non-Small Cell Lung Cancer**

Ying Zhao,<sup>†</sup> Wenfei Liu,<sup>#</sup> Ying Tian,<sup>†</sup> Zhenlu Yang<sup>†</sup>, Xiaofen Wang,<sup>†</sup> Yunlei Zhang,<sup>†</sup>  
Yuxia Tang,<sup>†</sup> Shuang Zhao,<sup>§</sup> Chunyan Wang,<sup>†</sup> Ying Liu,<sup>†</sup> Jing Sun,<sup>†</sup> Zhaogang  
Teng,<sup>\*,†,‡</sup> Shouju Wang,<sup>\*,†</sup> and Guangming Lu<sup>\*,†,‡</sup>

<sup>†</sup>Department of Medical Imaging, Jinling Hospital, Medical School of Nanjing University, Nanjing, 210002 Jiangsu, P.R. China.

<sup>#</sup>Department of Respiration, Nanjing First Hospital, Nanjing Medical University, 210006, Jiangsu, P. R. China

<sup>‡</sup>State Key Laboratory of Analytical Chemistry for Life Science, School of Chemistry and Chemical Engineering, Nanjing University, Nanjing, 210093 Jiangsu, P. R. China

<sup>§</sup>Department of Oncology, Jinling Hospital, Medical School of Nanjing University, Nanjing, 210002 Jiangsu, P.R. China.

\*Corresponding Authors. Fax: +86-25-8480-4659. Tel: +86-25-8086-0185.

E-mail: tgz@fudan.edu.cn (Teng Z.)

E-mail: shouju.wang@gmail.com (Wang S.)

E-mail: cjr.luguangming@vip.163.com (Lu G.)

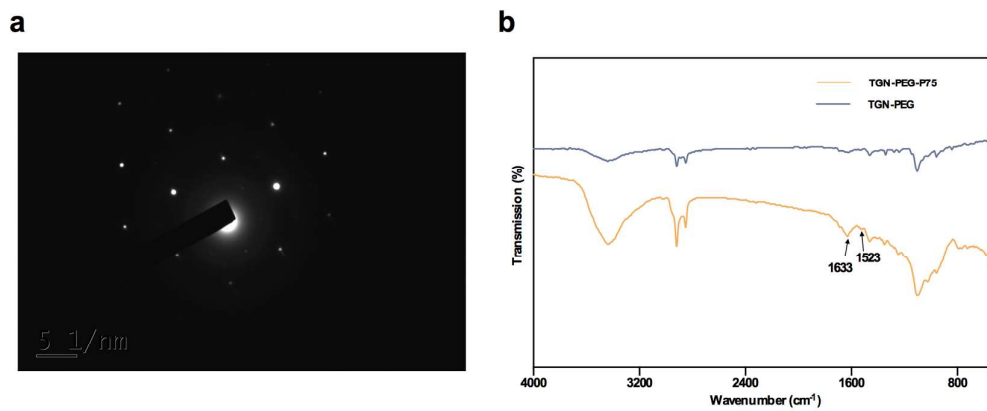

**Figure S1.** (a) The selected area electron diffraction pattern of the top of a single TGN-PEG-P75. (b) FTIR spectra of the TGN-PEG and TGN-PEG-P75.

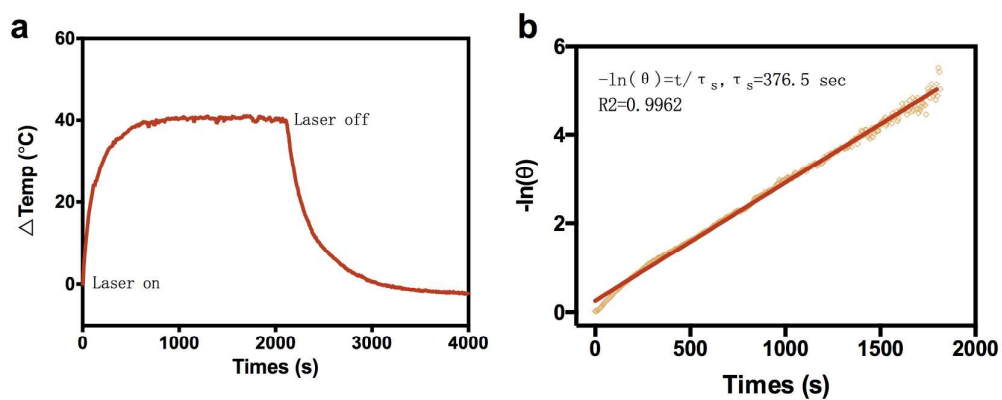

**Figure S2.** (a) Heating and cooling curves of  $45 \mu\text{g}\cdot\text{mL}^{-1}$  TGN-PEG-P75. The laser lasted for 35 min, and then the laser was turned off. (b) The linear regression between cooling period and the negative natural logarithm of driving force temperature.

**Table S1.** Photothermal conversion efficacy of different types of nanomaterials-based photothermal agents.

| Nanomaterials                          | Photothermal conversion efficacy | Wavelength | Reference                                          |
|----------------------------------------|----------------------------------|------------|----------------------------------------------------|
| gold nanoprisms                        | 70%                              | 660nm      | <i>RSC ADV.</i> 2015, 5, 81682-81688               |
| gold nanocages                         | 63%                              | 808 nm     | <i>Angew. Chem. Int. Ed.</i> 2013, 52, 13958-64    |
| dopamine-melanin colloidal nanospheres | 40%                              | 808 nm     | <i>Adv. Mater.</i> 2013, 25, 1353-1359             |
| black phosphorus quantum dots          | 28%                              | 808 nm     | <i>Angew. Chem. Int. Ed.</i> 2015, 54, 11526-11530 |
| graphene oxide                         | 25%                              | 532 nm     | <i>Chem. Commun.</i> 2014, 50, 14345-14348         |
| Cu <sub>2-x</sub> Se nanoparticles     | 22%                              | 800 nm     | <i>Nano Lett.</i> 2011, 11, 2560-2566              |
| gold rod                               | 21%                              | 800 nm     | <i>Nano Lett.</i> 2011, 11, 2560-2566              |
| gold nanoshells                        | 13%                              | 800 nm     | <i>Nano Lett.</i> 2011, 11, 2560                   |

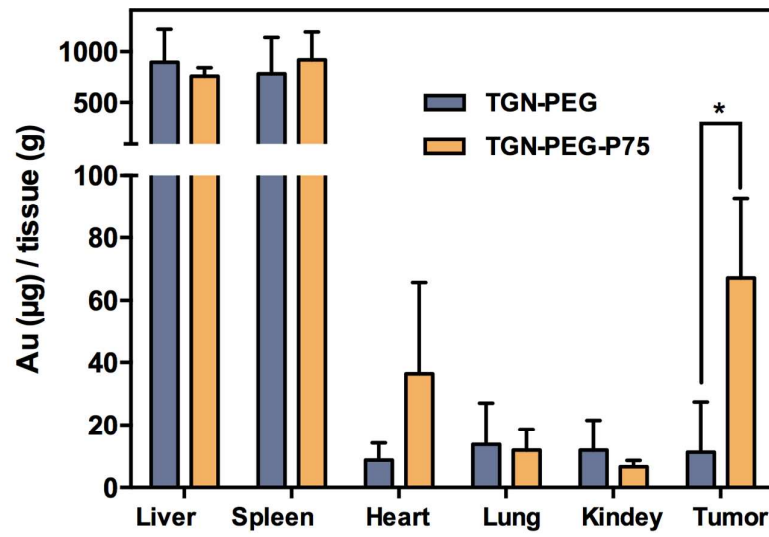

**Figure S3.** The biodistribution of TGN-PEG and TGN-PEG-P75 in HCC827 tumor-bearing mice (three mice per group).

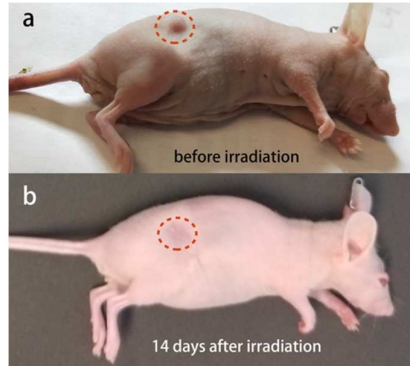

**Figure S4.** Digital photos of mice (TGN-PEG-P75 + laser group) before (a) and 14 days after irradiation (b). The tumor was indicated by the red circles.

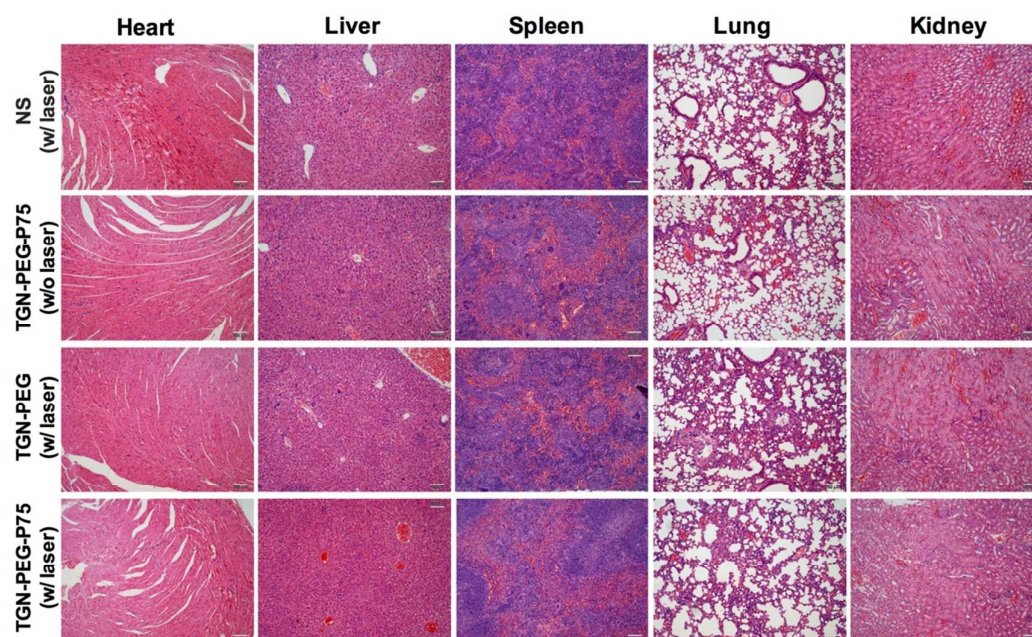

**Figure S5.** H&E images of major organs of HCC827 tumor-bearing mice after 14 days of different treatments. Scale bar: 100  $\mu$ m.
